# Supplementary material
Source: MDPI journal article supplement (https://www.mdpi.com/2075-4701/13/2/417)
Supplement: s1 [file s1]

# Reactions and Morphologies of Mg and Mg/Teflon/Viton Particles during Oxidation

Yifan Li <sup>1</sup>, JieWang <sup>1</sup>, Dong Shen <sup>2</sup>, Haoying Liu <sup>1</sup>, Dongming Song <sup>1</sup> and Yanchun Li <sup>1,\*</sup>

<sup>1</sup> Department of Chemical Engineering, Nanjing University of Science and Technology, Nanjing 210097, China

<sup>2</sup> Zhejiang Material Industry Guanghua Civil Explosive Materials Co., Ltd., Hangzhou 310008, China

\* Correspondence: liyanchun@njjust.edu.cn; Tel.: +86-13601457975

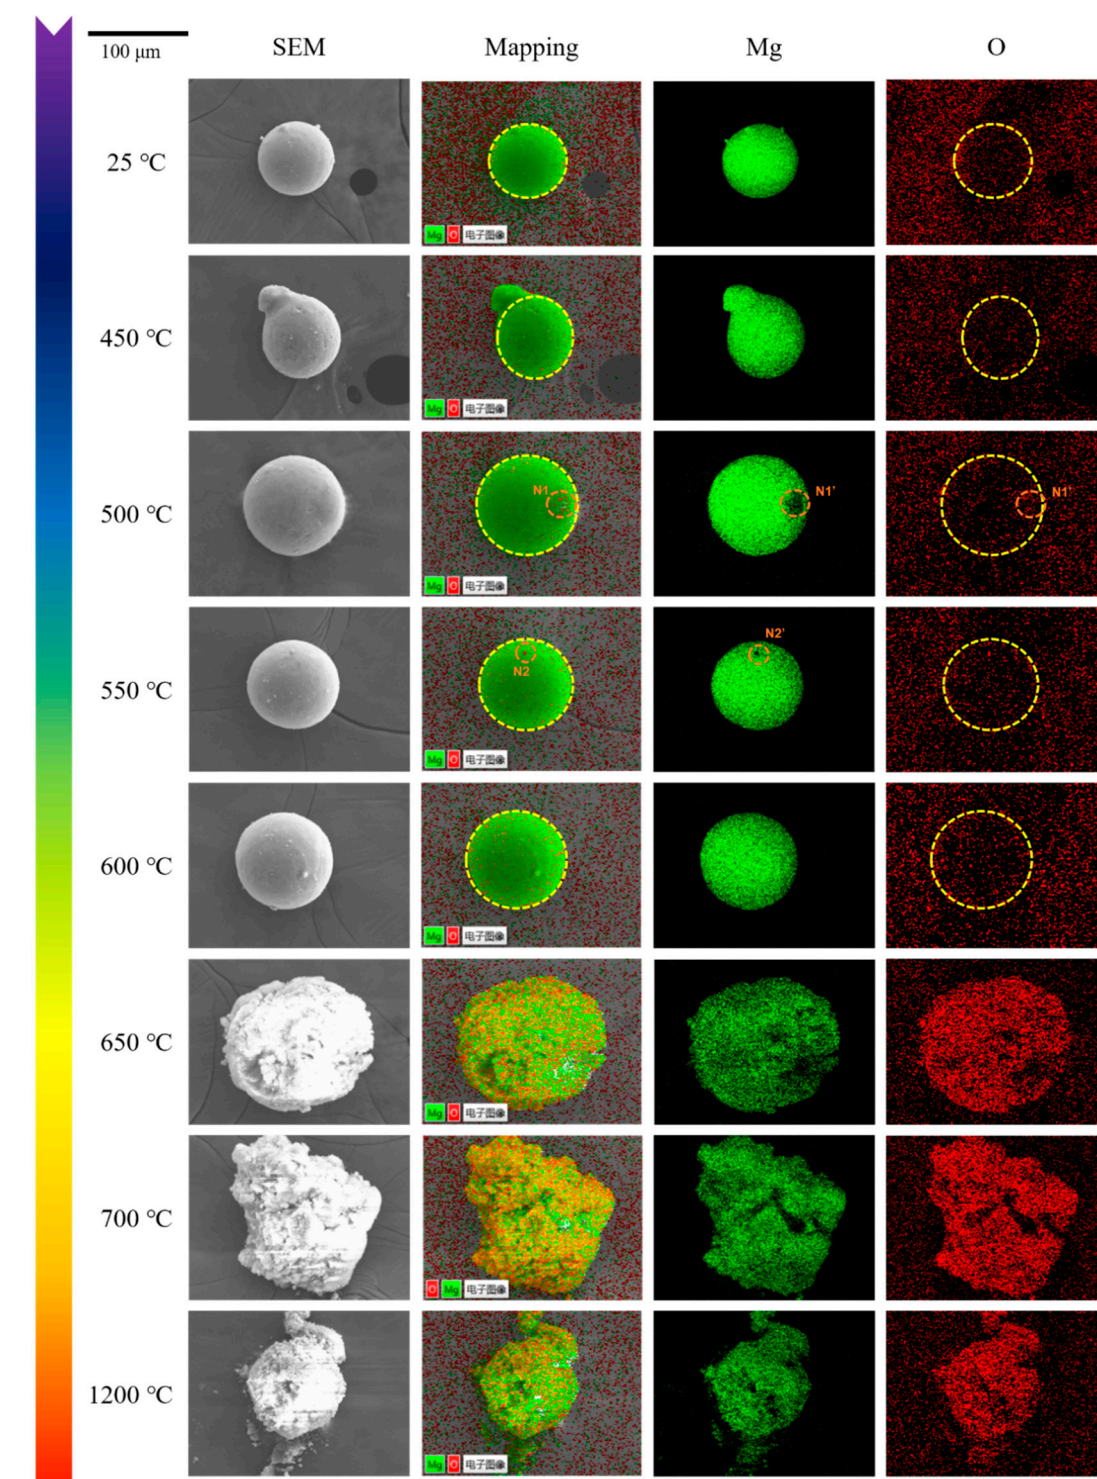

**Figure S1.** The mapping results of the surface of Mg after the heating at 300 °C, 400 °C, 500 °C, 600 °C, 700 °C and 1200 °C in O<sub>2</sub>. The heating rate was 10 K/min. The magnification was 5000 times.

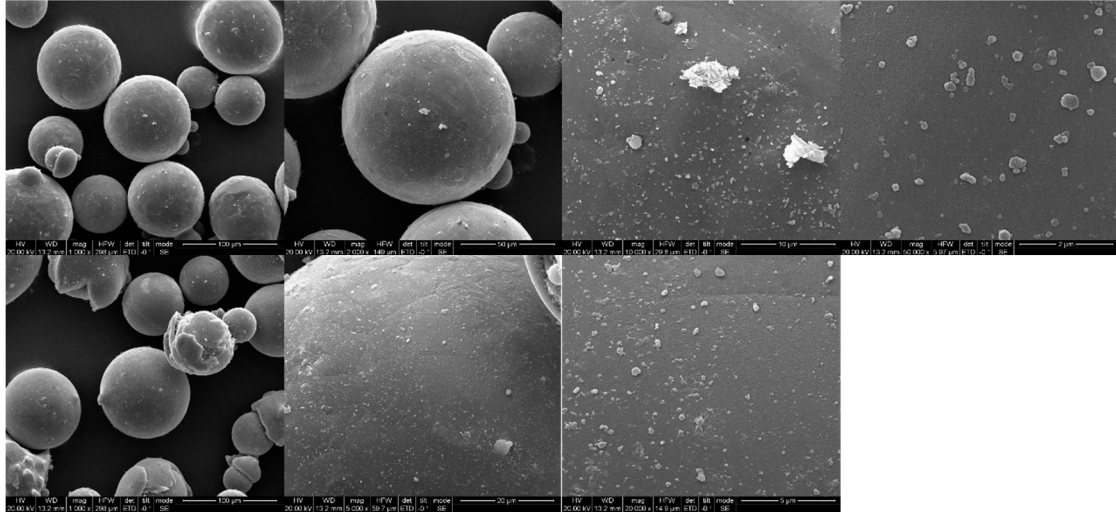

**Figure S2.** The SEM results of the surface of Mg at 25 °C

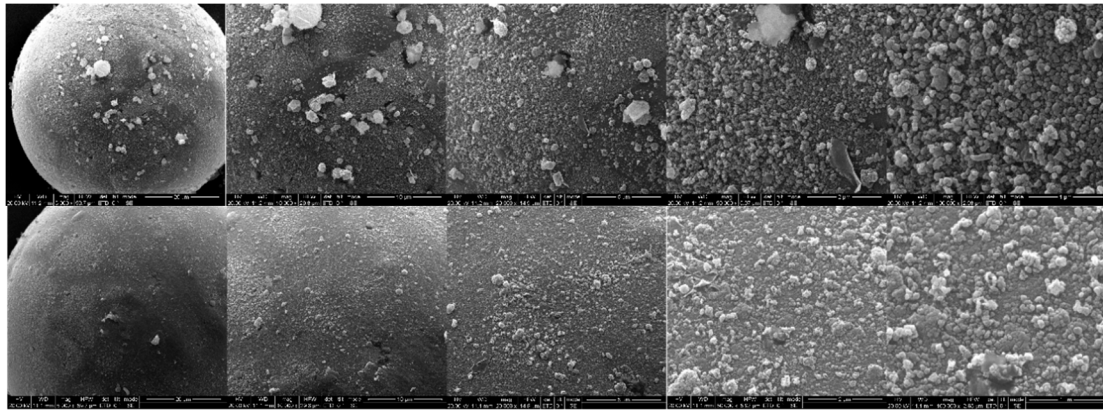

**Figure S3.** The SEM results of the surface of Mg after the heating at 500 °C in O<sub>2</sub>.

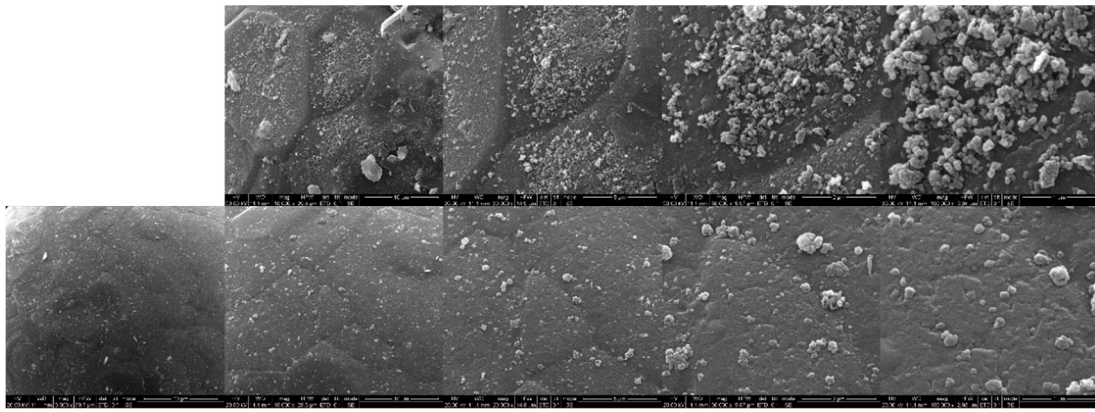

**Figure S4.** The SEM results of the surface of Mg after the heating at 550 °C in O<sub>2</sub>.

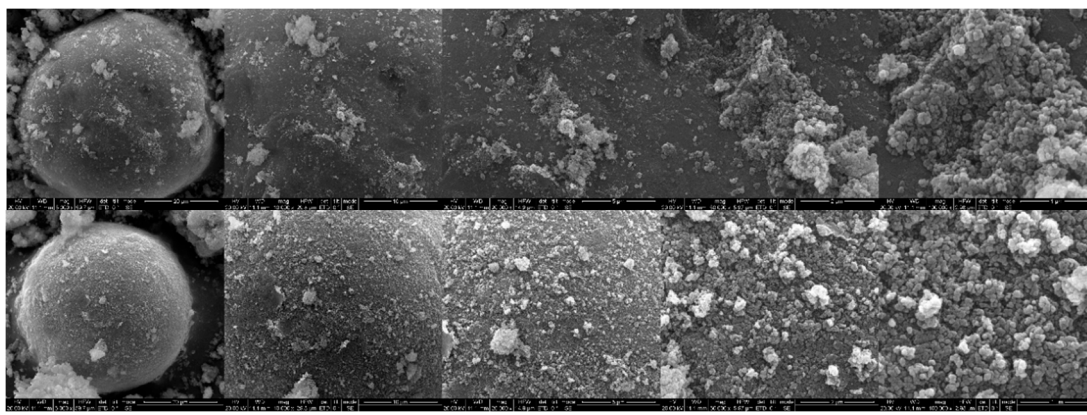

**Figure S5.** The SEM results of the surface of Mg after the heating at 600 °C in O<sub>2</sub>.

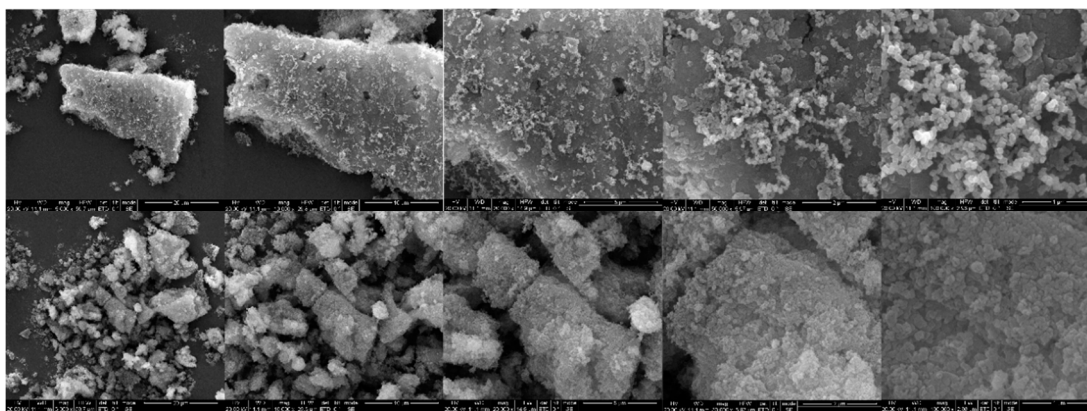

**Figure S6.** The SEM results of the surface of Mg after the heating at 650 °C in O<sub>2</sub>.

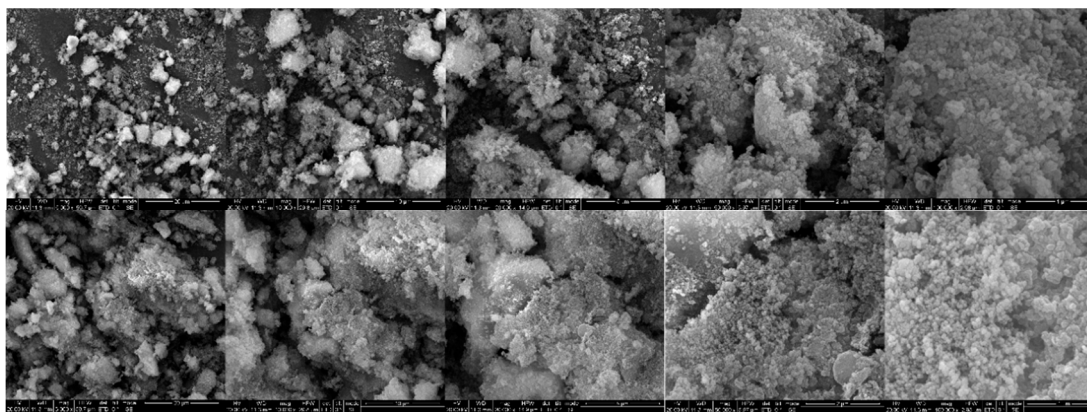

**Figure S7.** The SEM results of the surface of Mg after the heating at 700 °C in O<sub>2</sub>.

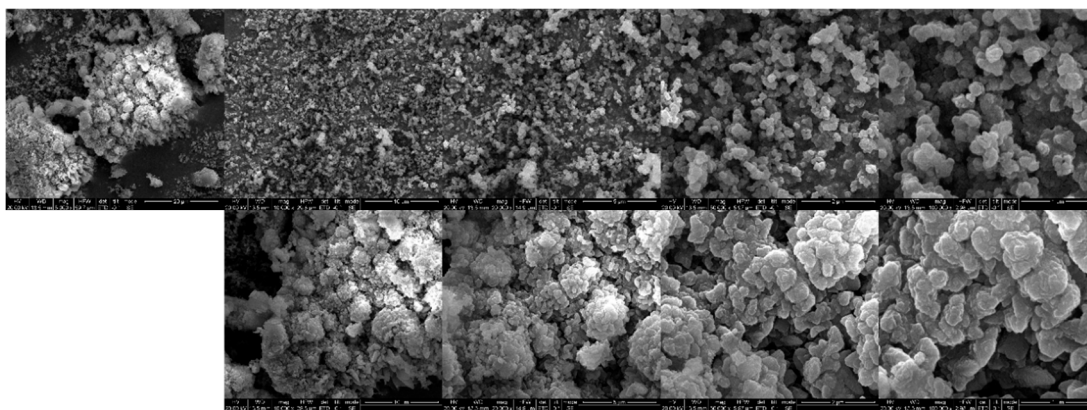



**Figure S8.** The SEM results of the surface of Mg after the heating at 1200 °C in O<sub>2</sub>.

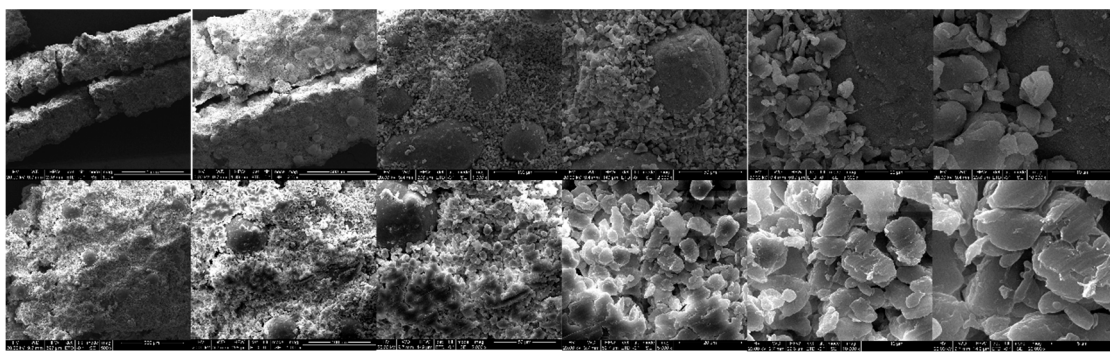

**Figure S9.** The SEM results of the surface of MTV at 25 °C.

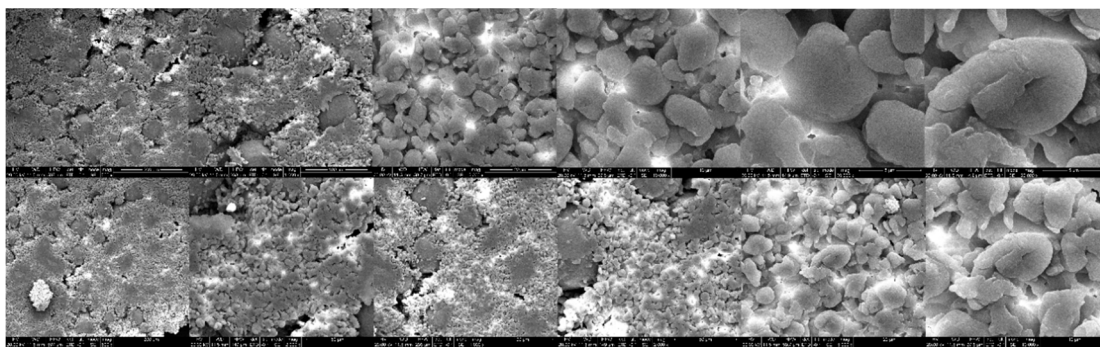

**Figure S10.** The SEM results of the surface of MTV after the heating at 300 °C in air.

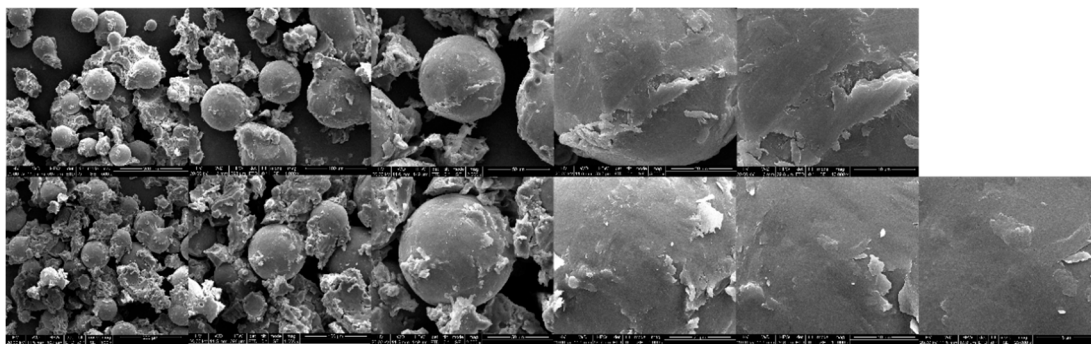

**Figure S11.** The SEM results of the surface of MTV after the heating at 400 °C in air.

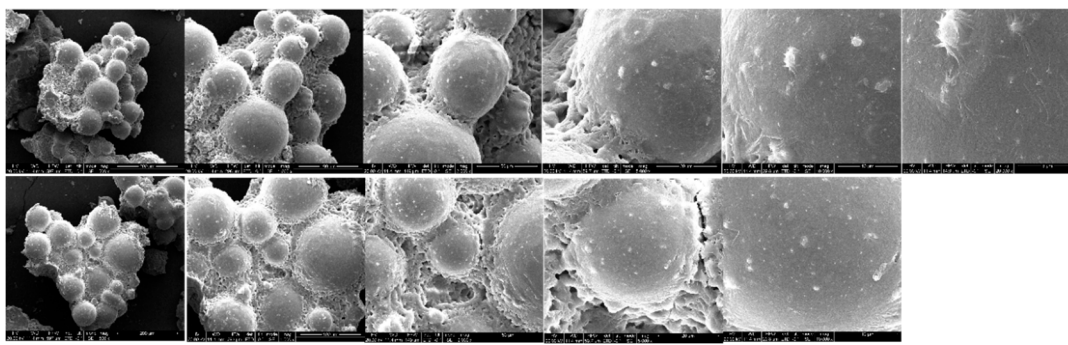

**Figure S12.** The SEM results of the surface of MTV after the heating at 500 °C in air.

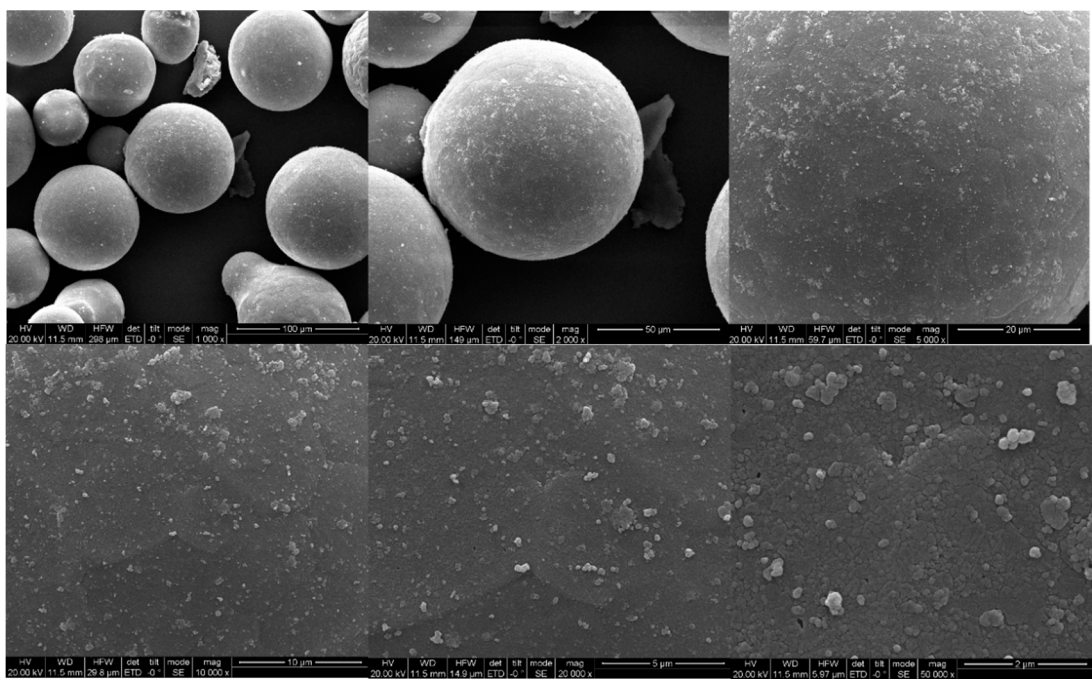

**Figure S13.** The SEM results of the surface of MTV after the heating at 600 °C in air.

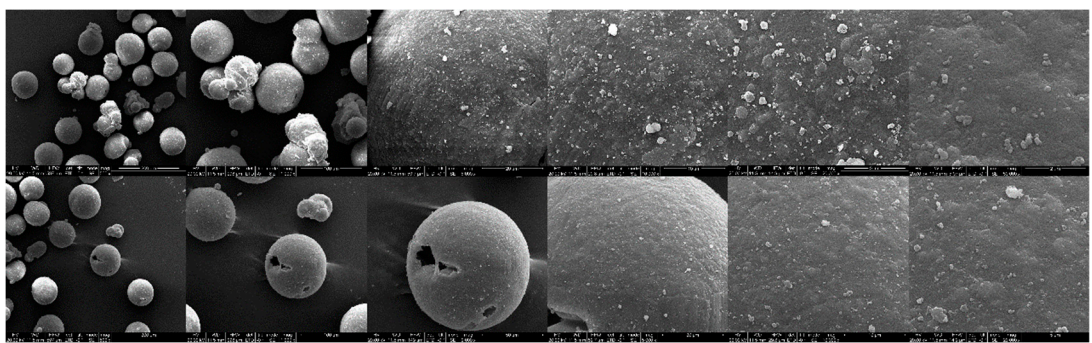

**Figure S14.** The SEM results of the surface of MTV after the heating at 700 °C in air.

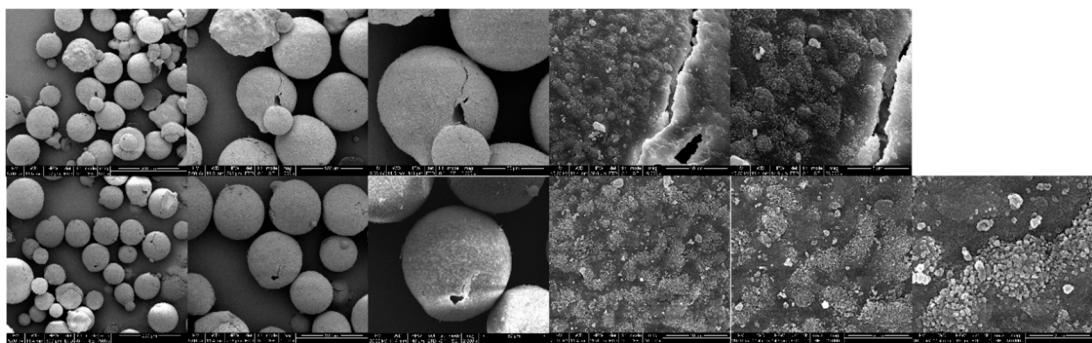

**Figure S15.** The SEM results of the surface of MTV after the heating at 800 °C in air.



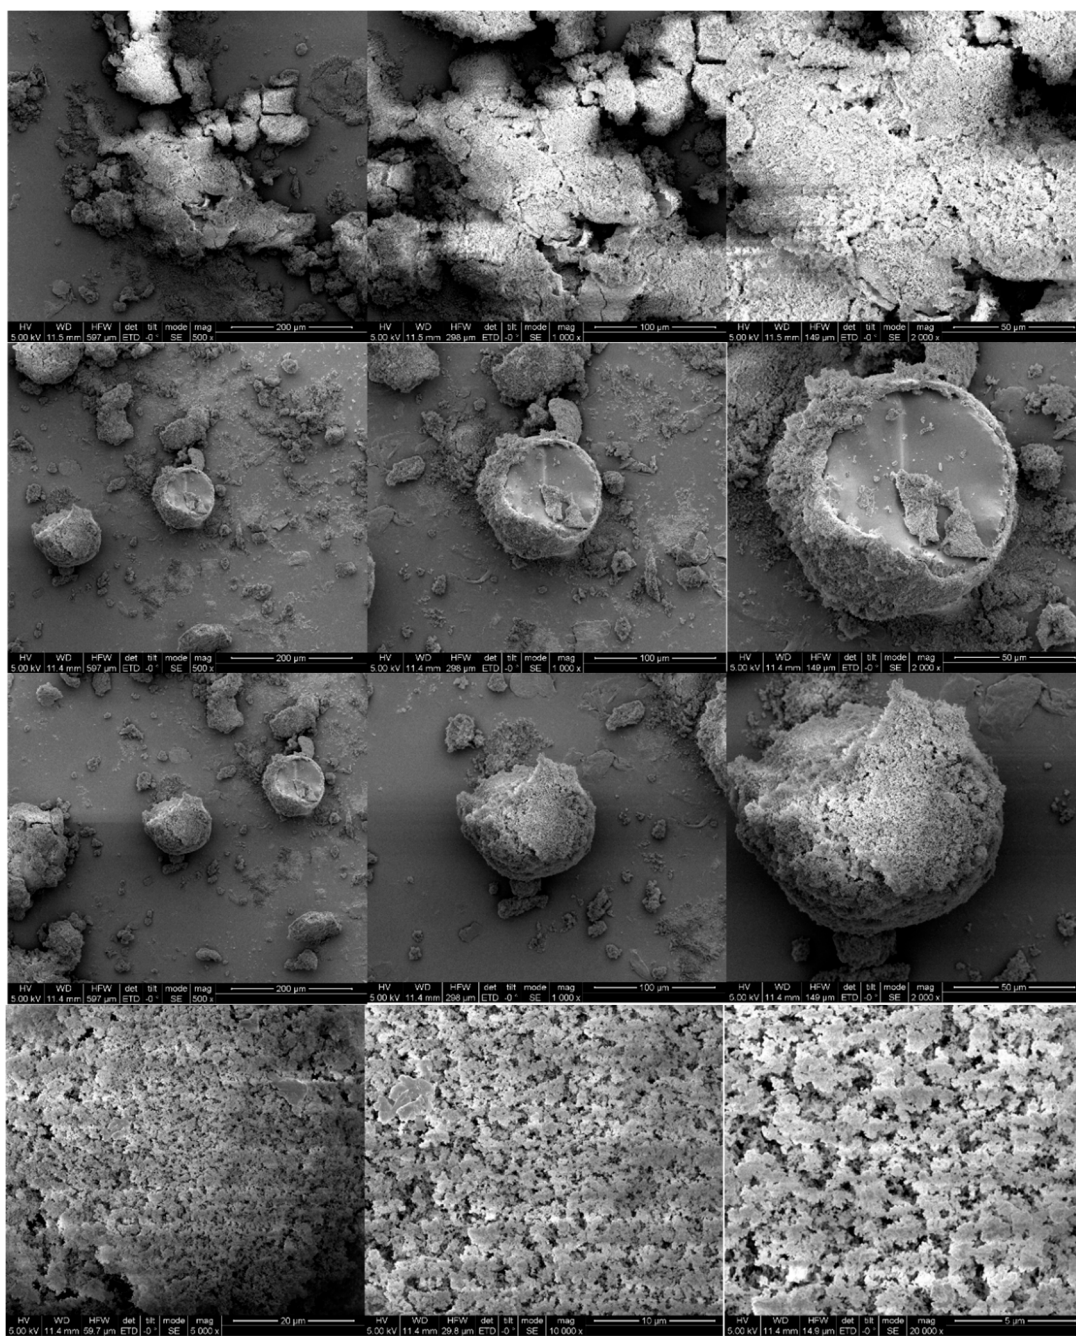

**Figure S16.** The SEM results of the surface of MTV after the heating at 900 °C in air.

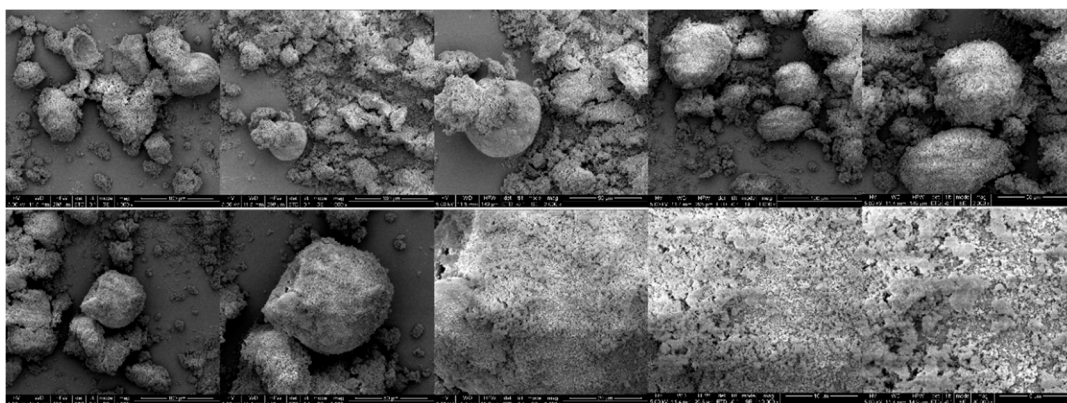

**Figure S17.** The SEM results of the surface of MTV after the heating at 1000 °C in air.

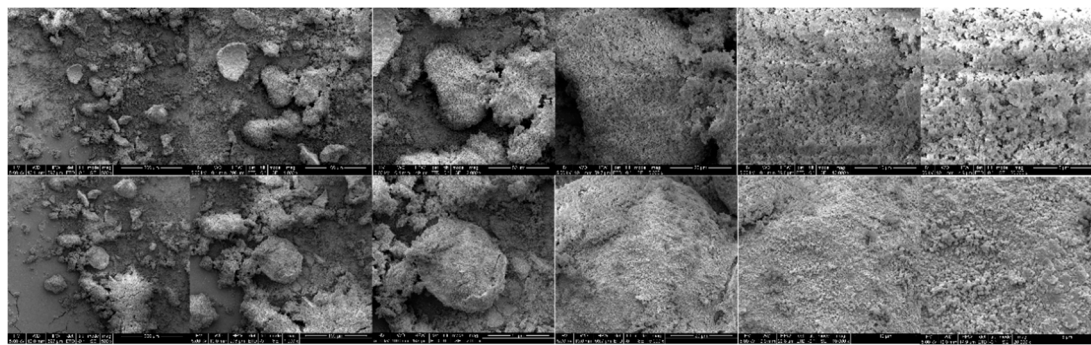

**Figure S18.** The SEM results of the surface of MTV after the heating at 1100 °C in air.

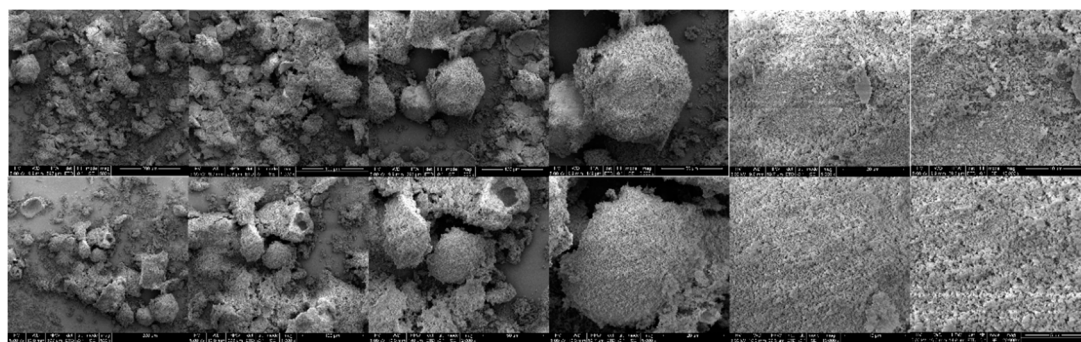

**Figure S19.** The SEM results of the surface of MTV after the heating at 1200 °C in air.



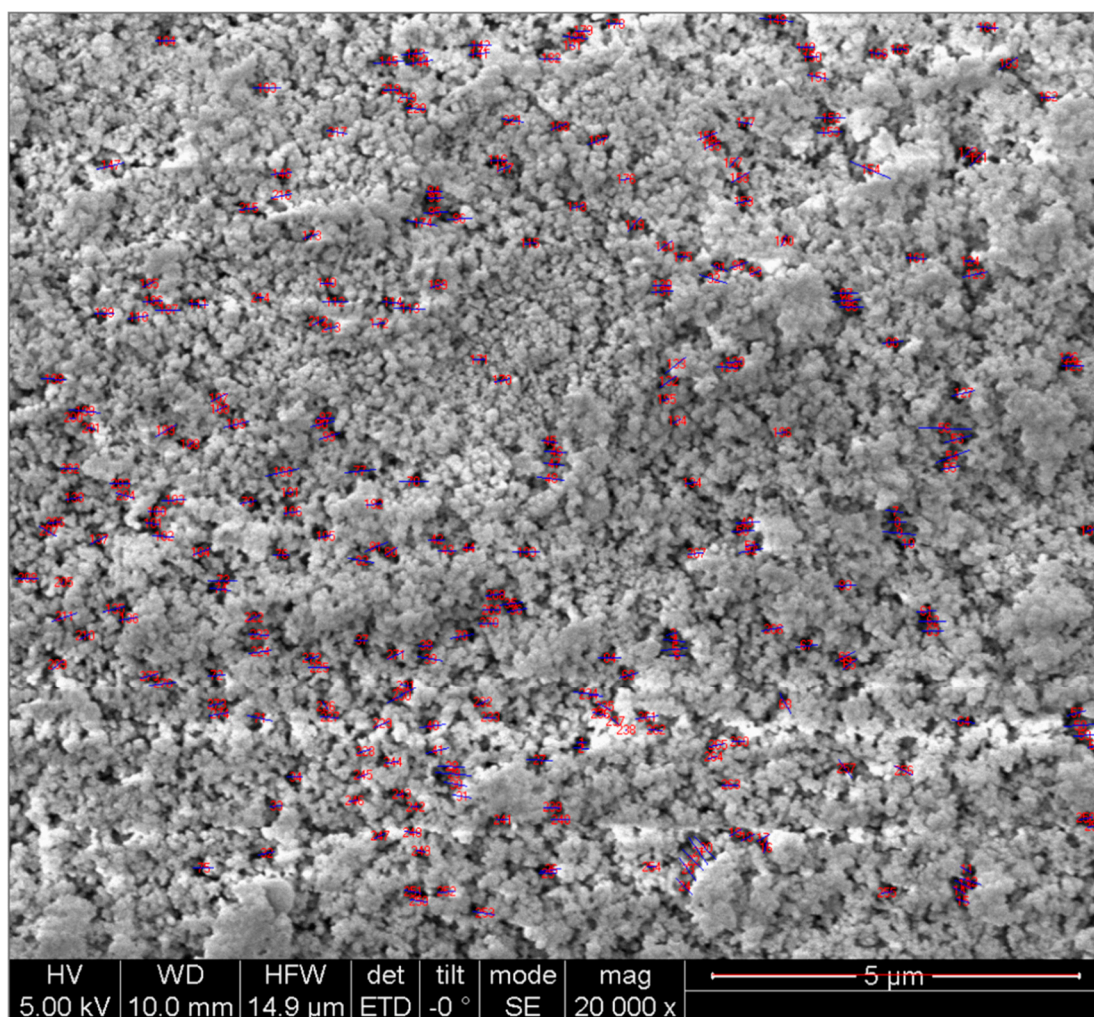

**Figure S20.** The calculation area of Nanometer 1.2 on the surface of MTV after the heating at 1200 °C in air.

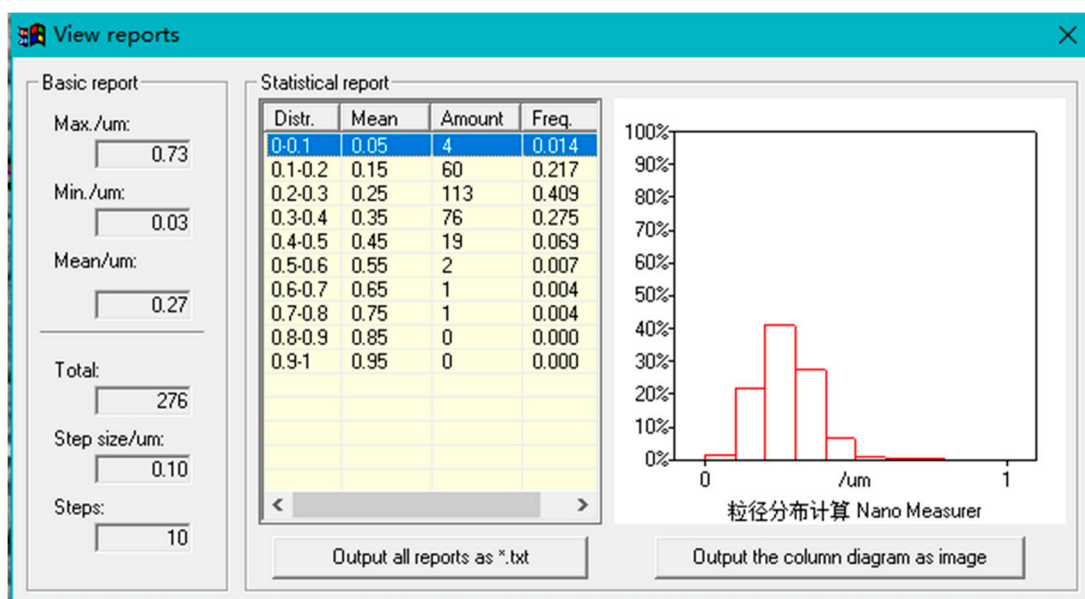

**Figure S21.** The calculation report of Nanometer 1.2 on the surface of MTV after the heating at 1200 °C in air.

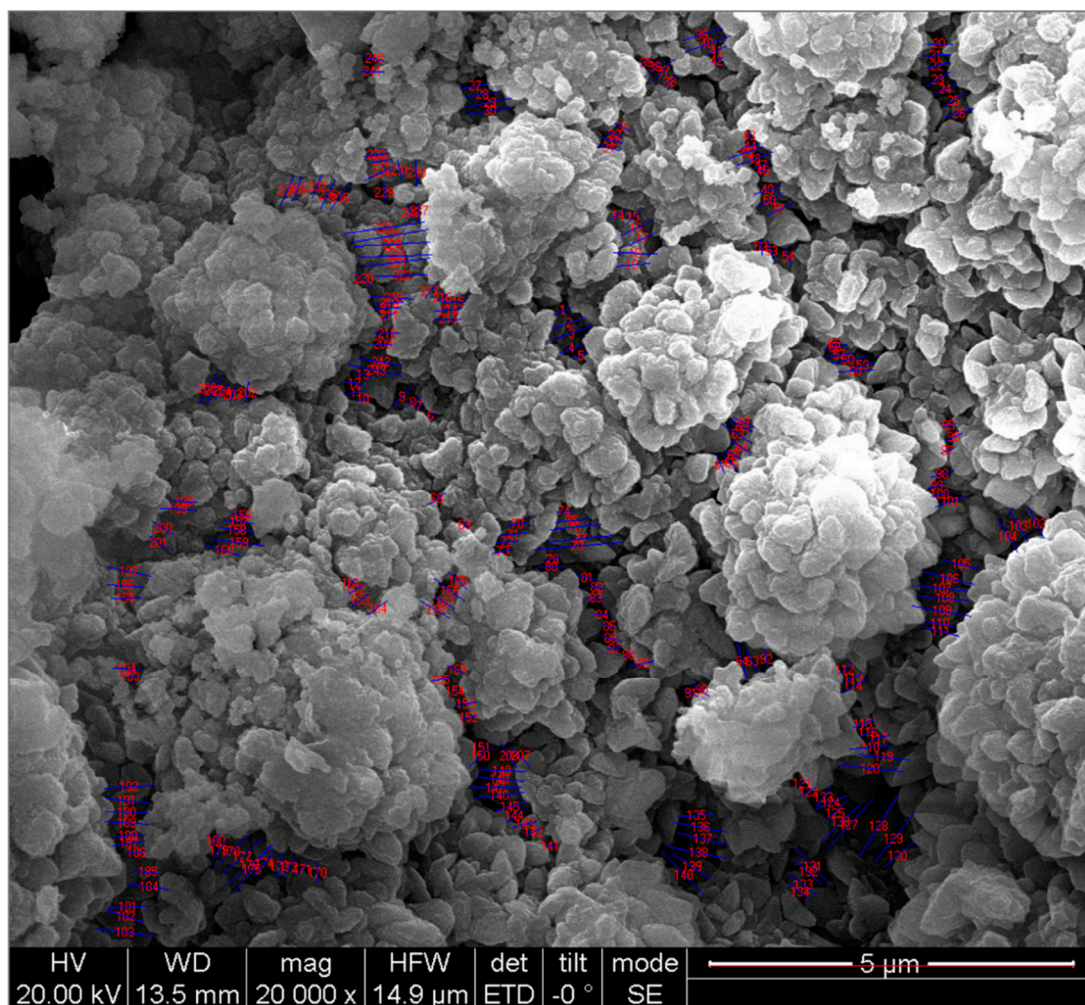

**Figure S22.** The calculation area of Nanometer 1.2 on the surface of Mg after oxidizing at 1200 °C in O<sub>2</sub>.

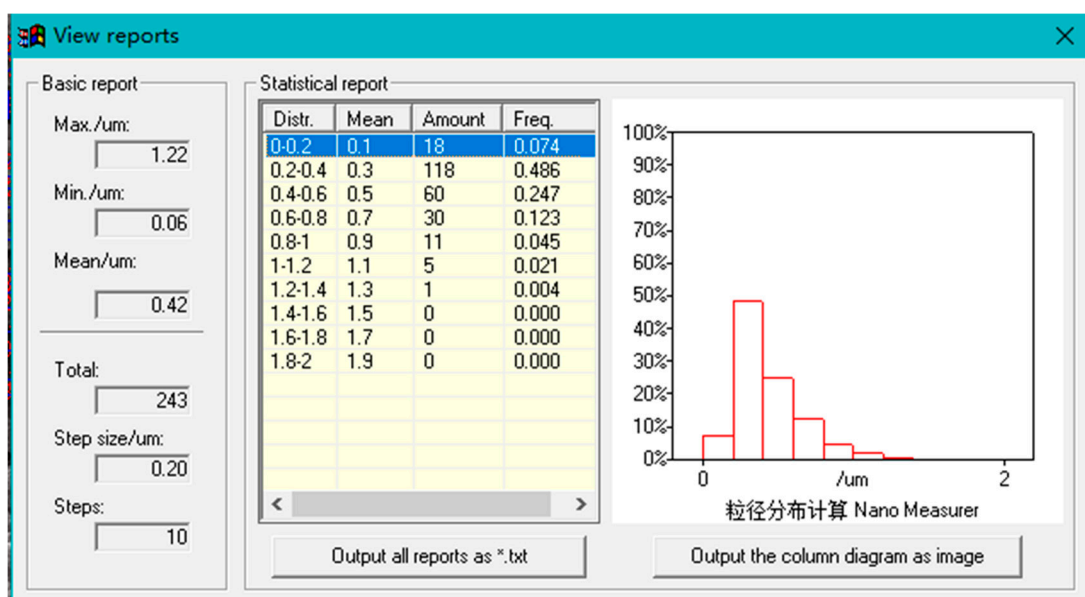

**Figure S23.** The calculation area of Nanometer 1.2 on the surface of Mg after oxidizing at 1200 °C in O<sub>2</sub>.

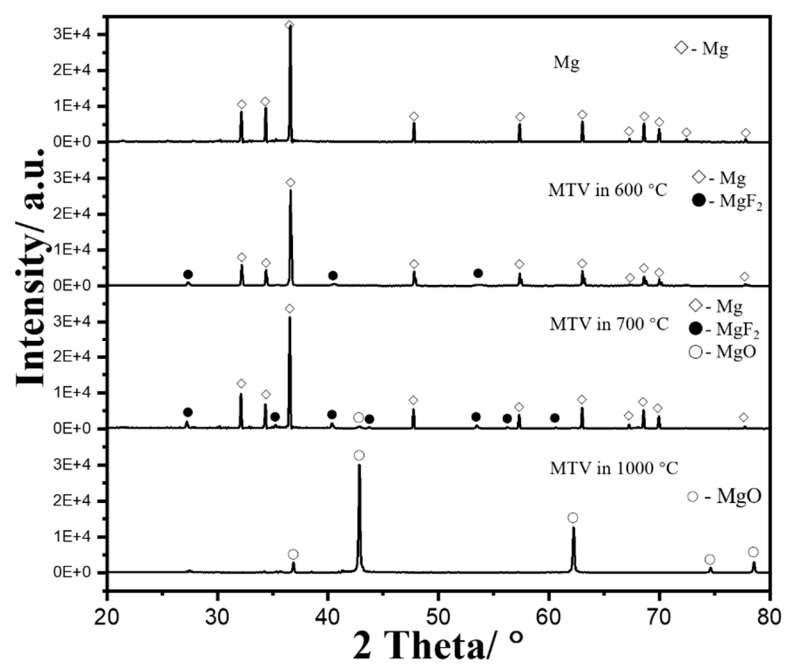

**Figure S24.** The XRD results of the residues of MTV after calcinated at 600, 700 and 1000 °C [1] in air, respectively.

## Reference

[1] Y. Li, J. Wang, H. Liu, Combustion properties of Mg-based ignition charge using Mg-Gd alloy powder as the fuel, Chemical engineering journal (2022) 441.
